# Supplementary material
Source: PubMed Central journal article supplement (PMC5831354)
Supplement: NIHMS913747-supplement-Supplemental_Materials.pdf [file NIHMS913747-supplement-Supplemental_Materials.pdf]

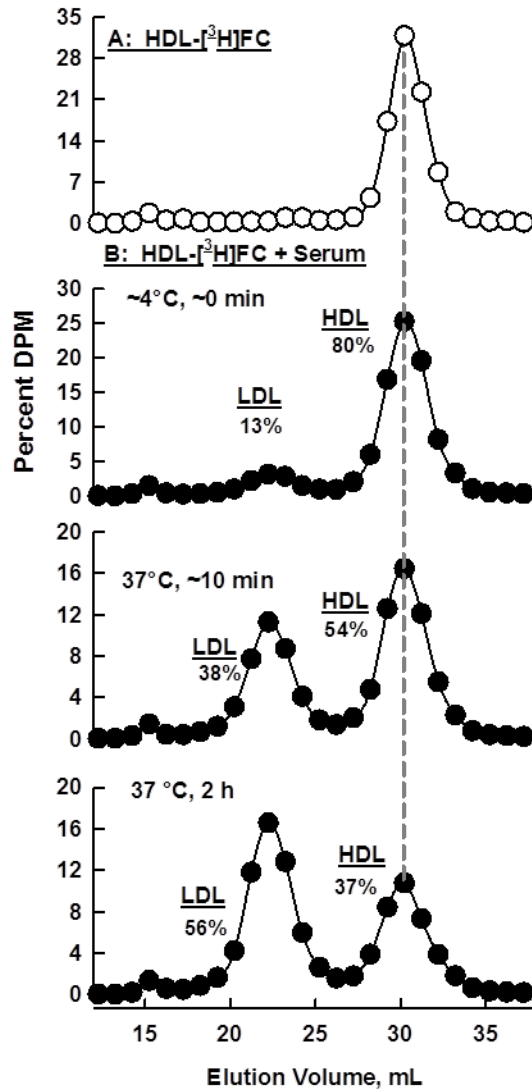

**Supplementary Figure I.** Transfer of HDL-<sup>3</sup>H]FC to Serum Lipoproteins. Grey dashed line indicates the peak elution volume for HDL. Experiments were conducted as in **Figure 2** for various incubation times and temperatures as labeled prior to SEC analysis.

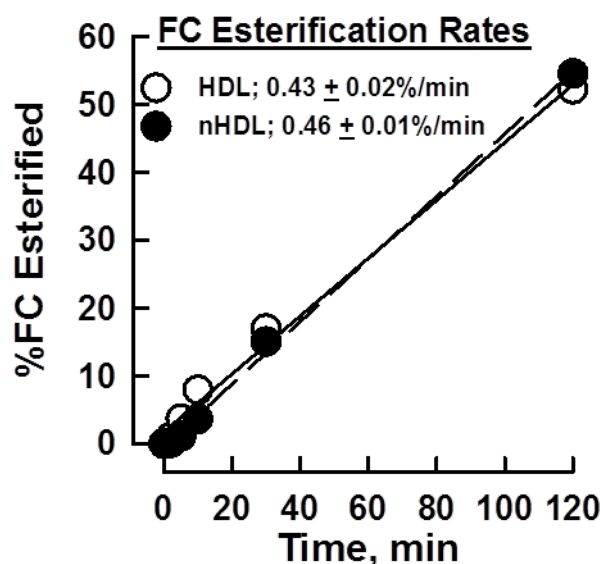

**Supplementary Figure II.** Mouse Plasma LCAT Activity vs. nHDL and HDL. [ $^3\text{H}$ ]FC was evaporated onto a small piece of filter paper, which was incubated with nHDL or HDL in TBS for three hours at room temperature. nHDL- or HDL-[ $^3\text{H}$ ]FC ( $\sim 50 \mu\text{g}$ ;  $0.05 \mu\text{Ci}$ ) were added to 1 mL mouse plasma on wet ice, mixed and  $50 \mu\text{L}$  were transferred to a scintillation vial for  $\beta$ -counting. The remaining mixture was transferred to a  $37^\circ\text{C}$  bath and additional  $50 \mu\text{L}$  aliquots were transferred to test tubes containing  $100 \mu\text{L}$  methanol at  $t = 2, 5, 10, 30,$  and  $120 \text{ min}$  and the lipids partitioned into 1 mL 2-propanol/hexane (2/3 v/v) with vortexing followed by low speed centrifugation. Aliquots ( $500 \mu\text{L}$ ) of each organic phase were transferred to conical tubes and the volume reduced under a nitrogen stream. The residues were redissolved in chloroform/methanol ( $25 \mu\text{L}$ ; 1/1; v/v) containing unlabeled CE and FC for visualization by  $\text{I}_2$  vapor. Each sample was applied to silica gel thin-layer plates and eluted with hexane/ethyl acetate (80:20). CE- and FC-positive spots were visualized by exposure to  $\text{I}_2$  vapor, collected by cutting the  $\text{I}_2$ -positive spots, transferred to vials containing scintillation fluid, and  $\beta$ -counted. LCAT activity was calculated as a ratio of  $\text{CE}_{\text{DPM}} / (\text{FC}_{\text{DPM}} + \text{CE}_{\text{DPM}})$ . These data show that the activities of mouse LCAT vs. nHDL and HDL are similar. According to the slopes of the kinetic curves,  $\sim 5\%$  of FC was esterified in 10 min.

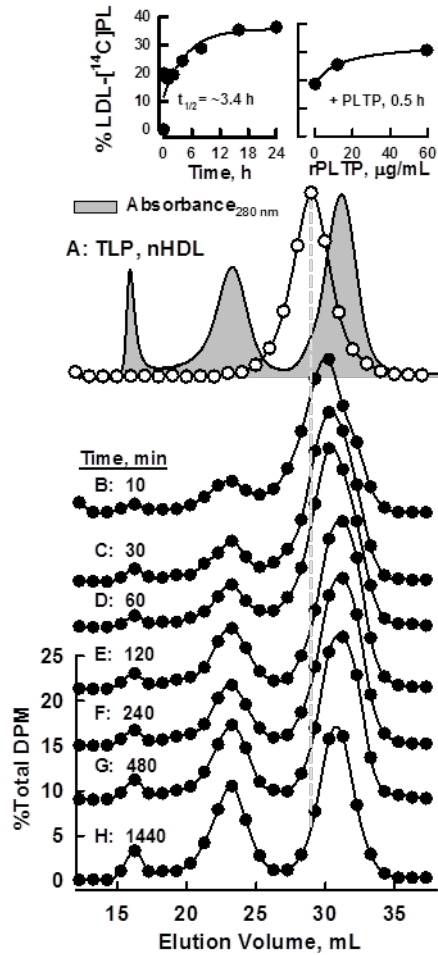

**Supplementary Figure III.** Transfer of nHDL-[<sup>14</sup>C]PL to TLP (total lipoproteins without lipid-free proteins). A) SEC of TLP according to its absorbance; nHDL-[<sup>14</sup>C]PL (○). B-H) SEC profile of [<sup>14</sup>C]PL after incubation with TLP at 37°C for various times as labeled (●). Grey dashed line indicates the peak elution volume for nHDL. Insert to A (left) shows the % [<sup>14</sup>C]PL in LDL as a function of time; Insert to A (right) shows the rPLTP-mediated increase in the transfer of nHDL-[<sup>14</sup>C]PL after 30 min incubation at 37 °C. TLP is obtained by ultracentrifugation of whole plasma for 3 d in buffer made  $d = 1.21$  g/mL (Beckman 50Ti @ 40,000) by the addition of KBr; TLP floats to the top and is collected.

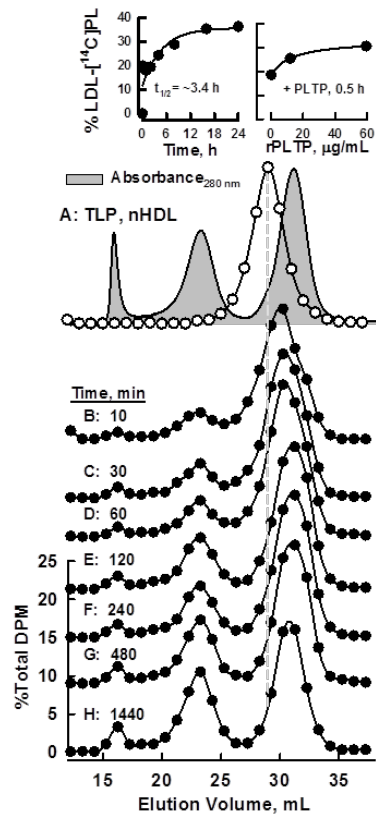

**Supplementary Figure IV.** Transfer of nHDL-[<sup>14</sup>C]PL to Isolated LDL. A) SEC of LDL according to its absorbance, grey fill; nHDL-[<sup>14</sup>C]PL (○). B-I) SEC profile of [<sup>14</sup>C]PL after incubation with LDL at 37°C for various times as labeled (●). Grey dashed line indicates the peak elution volume for nHDL. Insert to A shows the % [<sup>14</sup>C]PL in LDL as a function of time;  $t_{1/2} = 4.1 \pm 0.4$  h.

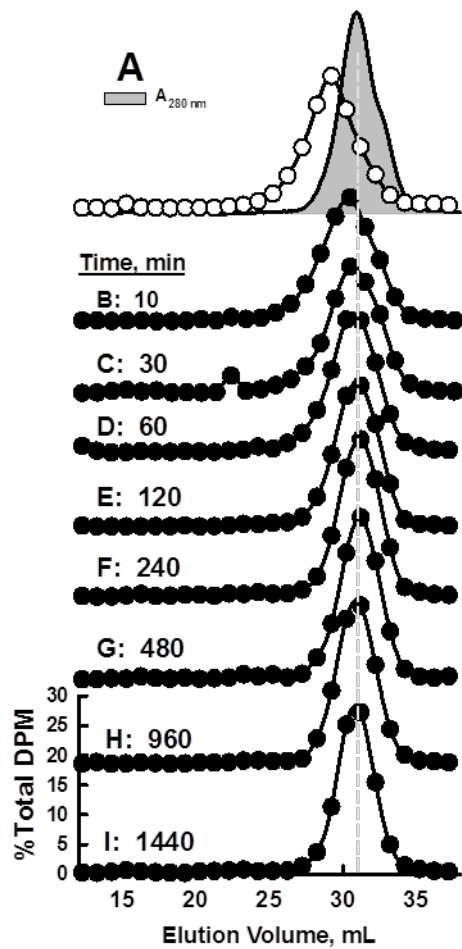

**Supplementary Figure V:** Transfer of nHDL- $^{14}\text{C}$ PL to Isolated HDL. A) SEC of HDL according to its absorbance, grey fill; nHDL- $^{14}\text{C}$ PL ( $\circ$ ). B-I) SEC profile of  $^{14}\text{C}$ PL after incubation with HDL at  $37^\circ\text{C}$  for various times as labeled ( $\bullet$ ). Grey dashed line indicates the peak elution volume for HDL.

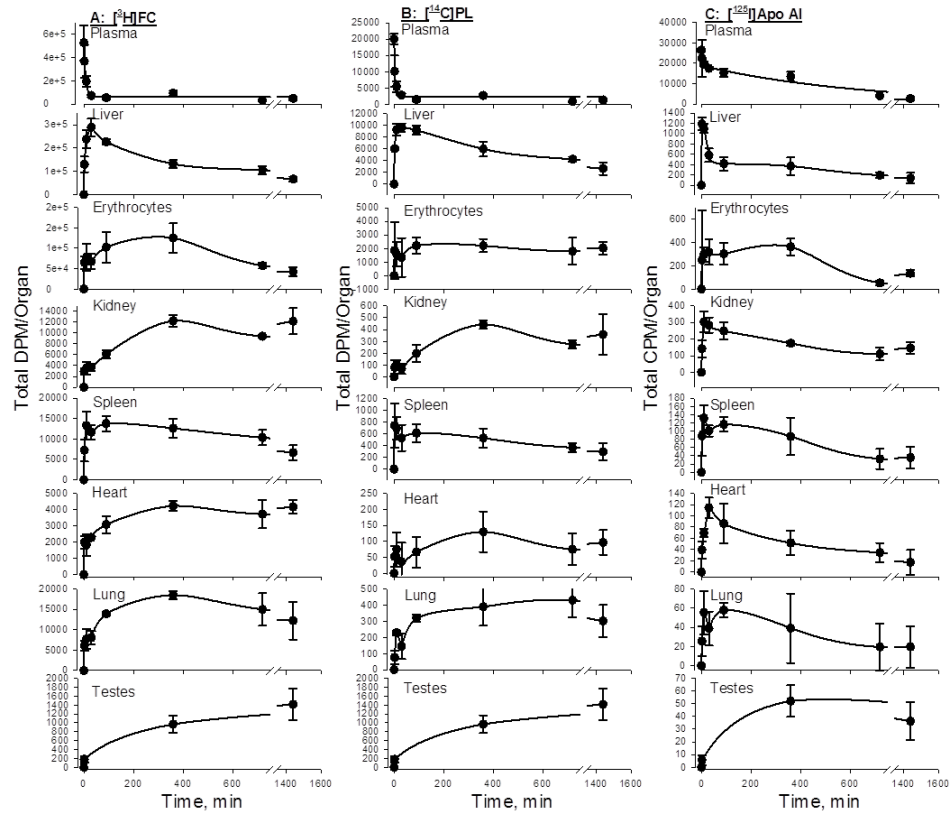

**Supplementary Figure VI.** In vivo distribution of  $^3\text{H}$ ,  $^{14}\text{C}$ , and  $^{125}\text{I}$  at various times after injection of nHDL- $^3\text{H}$ ]FC,  $^{14}\text{C}$ ]PL, and  $^{125}\text{I}$ ]apo AI. Curves are fitted to the data using a smoothing function in Sigma Plot (Systat Software, Inc.). Other details are in the legend to **Figure 6** and in the **Materials and Methods**.

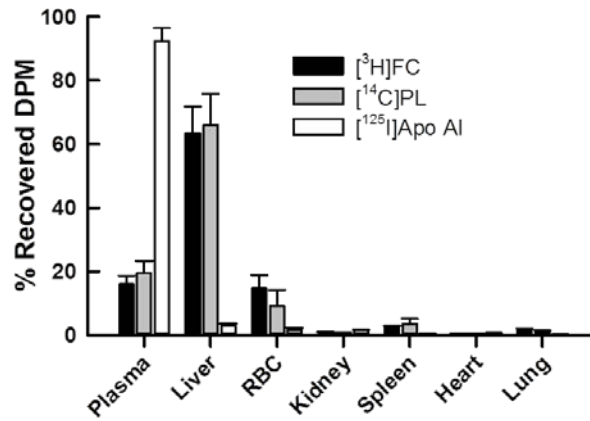

**Supplementary Figure VII.** In vivo distribution of <sup>3</sup>H, <sup>14</sup>C, and <sup>125</sup>I 30 min after injection of nHDL-<sup>3</sup>H]FC, [<sup>14</sup>C]PL, and [<sup>125</sup>I]Apo AI. Details are in the **Materials and Methods**.

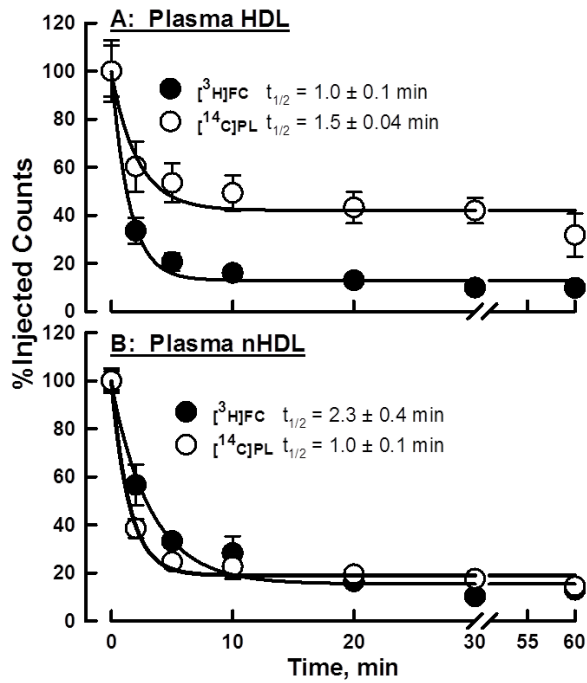

**Supplementary Figure VIII.** In Vivo Plasma Kinetics of HDL- and nHDL- $[^3\text{H}]FC$  and  $-[^{14}\text{C}]PL$ . As described in **Materials and Methods**, radiolabeled HDL and nHDL were injected into mice. At various times mice were sacrificed and their plasma collected and  $\beta$ -counted. The plotted data were fitted to a 2-parameter exponential decay curve from which the halftimes were calculated.



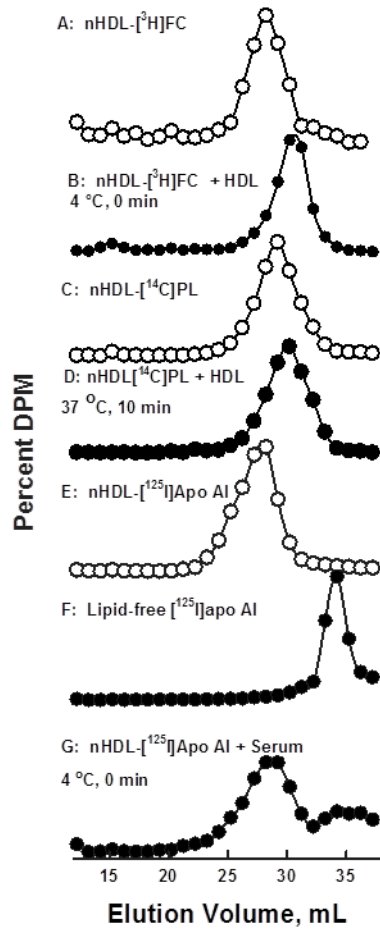

Supplementary Figure IX: SEC of nHDL-analytes before and after short term incubations (0 or 10 min) with HDL or serum as labeled. Taken from Figure 2, 4, and Supplementary Figure V.
