# Supplementary material
Source: PubMed Central journal article supplement (PMC5831354)

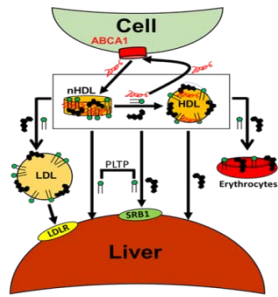

Supplement: NIHMS913747-supplement-graphic_abstract.pdf [file NIHMS913747-supplement-graphic_abstract.pdf]
